# Supplementary material
Source: ML conference proceedings conference paper supplement (https://www.ecva.net/papers/eccv_2022/papers_ECCV/html/136800108_ECCV_2022_paper.php)

Root

animal

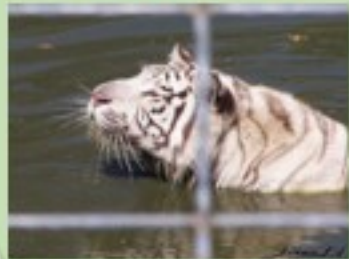

plant

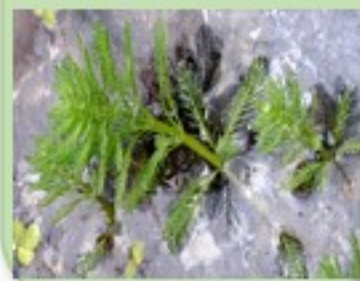

domestic animal

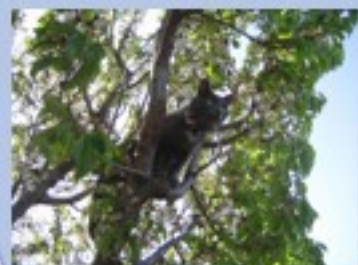

aquatic

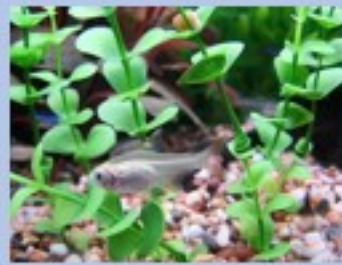

tree

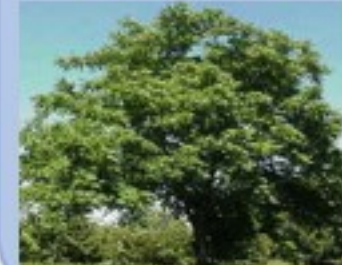

dog

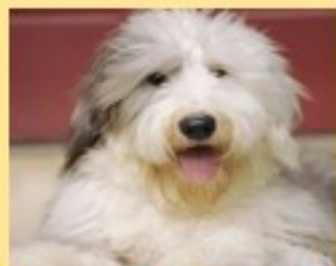

domestic cat

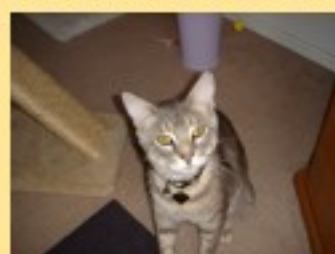

oak

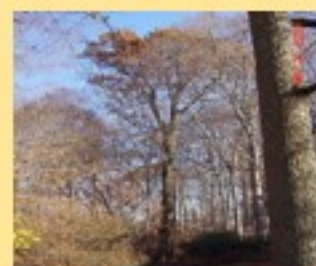

gum tree

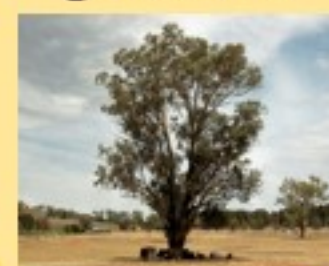

cur

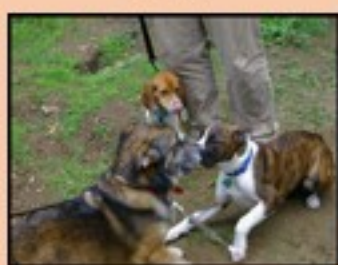

leonberg

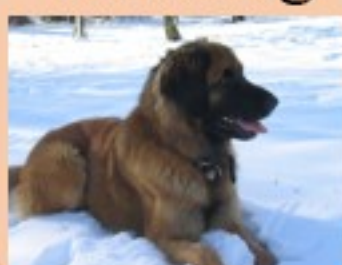

hunting dog

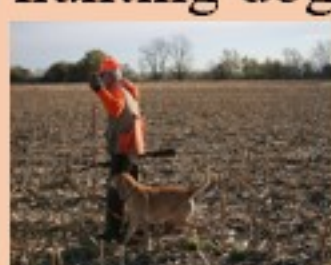

eucalyptus

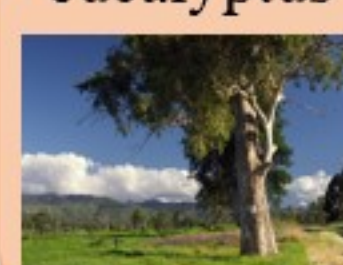

tupelo

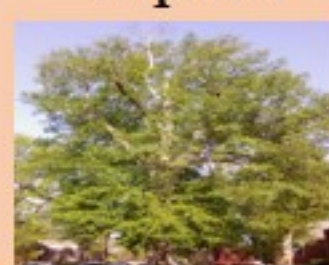

Supplement: Supplementary file 4 [file 136800108-supp.zip]
