# Supplementary material
Source: ML conference proceedings conference paper supplement (https://www.ecva.net/papers/eccv_2022/papers_ECCV/html/136800108_ECCV_2022_paper.php)

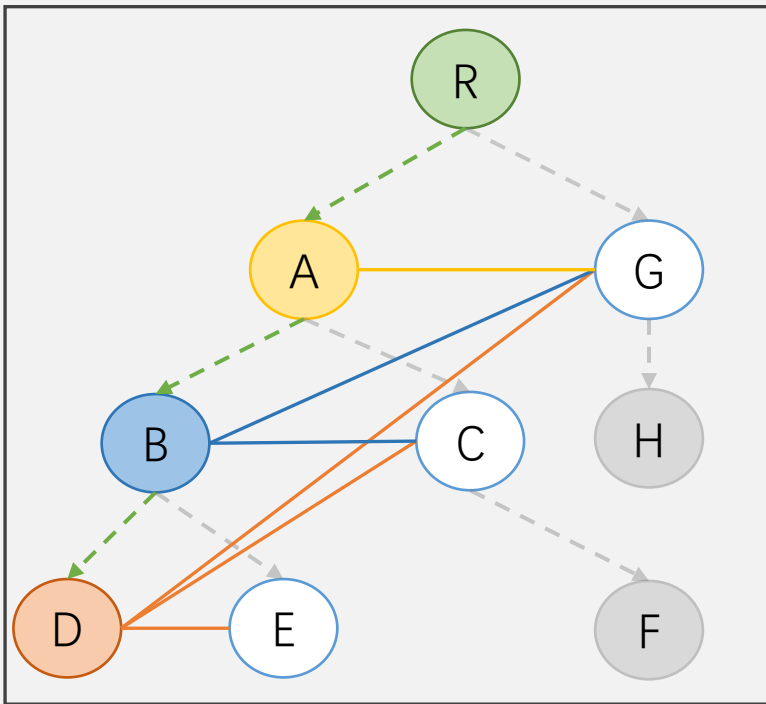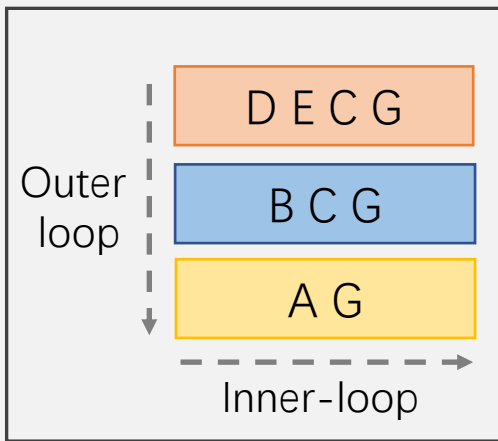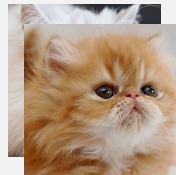

Images from Class D

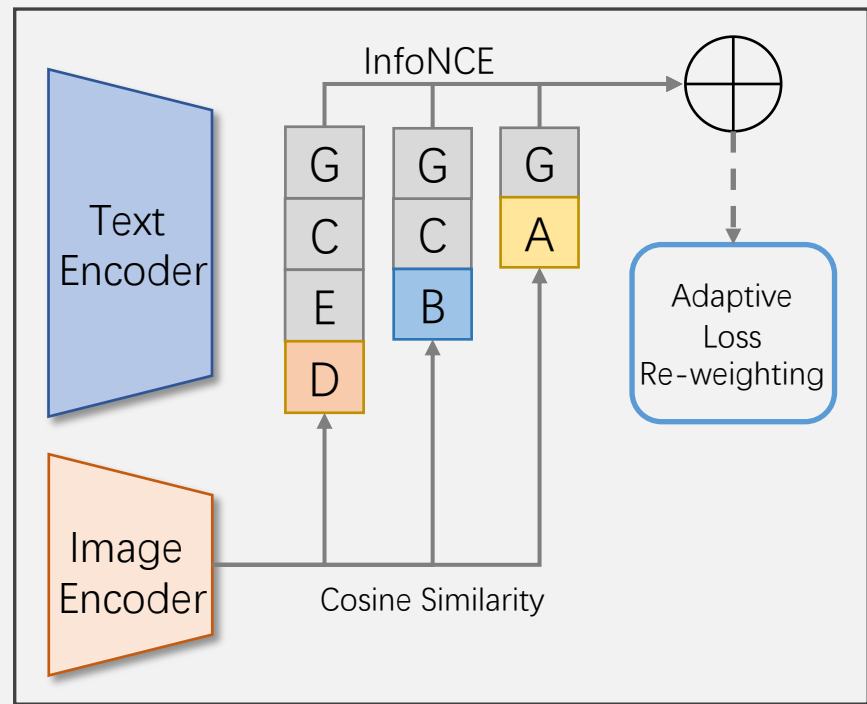

Supplement: Supplementary file 2 [file 136800108-supp.zip]

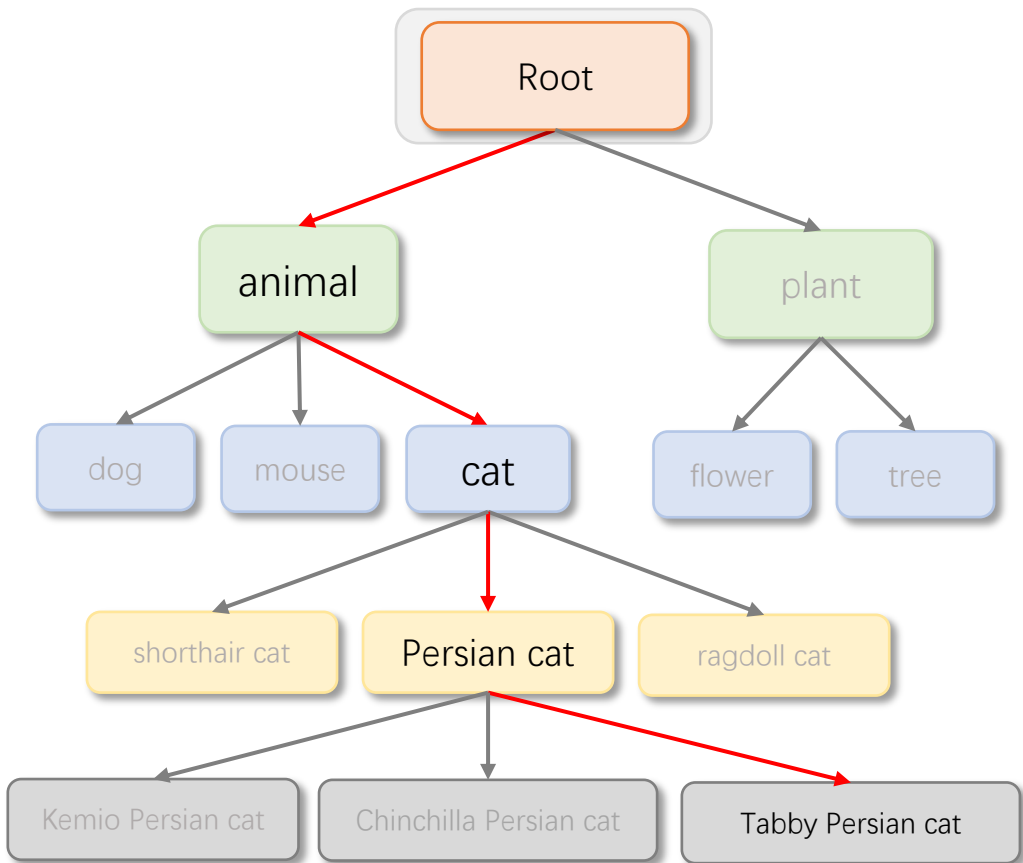

Supplement: Supplementary file 3 [file 136800108-supp.zip]
